# Supplementary material for: Triple-decker main group cations
Source: Royal Society of Chemistry journal article supplement (doi:10.1039/b005425i), 2001-01-01
Supplement: b005425i.doc [file b005425i.doc]

# SUPPLEMENTARY MATERIAL

# Triple Decker Main Group Cations

Alan H. Cowley*, Charles L. B. Macdonald, Joel S. Silverman, John D. Gorden and Andreas Voigt

## Department of Chemistry and Biochemistry

### The University of Texas at Austin

*Austin, Texas 78712*

**Summary of Theoretical Results**

All calculations done with the Gaussian 94[[1]](#endnote-2) package of programs. Each molecule/ion was fully optimized in the indicated symmetry. Bond lengths in Å, angles in degrees, Xt is the centroid of a terminal aromatic ring, Xb is the centroid of the bridging aromatic ring and dihedral is defined as the angle between the two planes defined by the points (Xt,n, Mn, and Xb) for n=1 and n=2 (0 = cisoid, 180 = transoid).

BP86[[2]](#endnote-3)/A[[3]](#endnote-4),[[4]](#endnote-5)

|  | Symmetry | Energy (au) | M-Xt | M-Xb | M-Xb-M | Xt-M-Xb | Dihedral |
| --- | --- | --- | --- | --- | --- | --- | --- |
| In+ |  | -1.6620558 |  |  |  |  |  |
| CpIn | C5v | -195.4527391 | 2.328 |  |  |  |  |
| [InCpIn]+ | D5h | -197.1866895 | 2.515 |  | 180 |  |  |
|  |  |  |  |  |  |  |  |
|  |  | H (Kcal/mol) |  |  |  |  |  |
| CpIn + In+  | [InCpIn]+ | -45.11 |  |  |  |  |  |
|  |  |  |  |  |  |  |  |
|  | Symmetry | Energy (au) | M-Xt | M-Xb | M-Xb-M | Xt-M-Xb | Dihedral |
| C6H6 | D6h | -232.2333777 |  |  |  |  |  |
| [(C6H6)In]+ | C6v | -233.9481026 | 2.621 |  |  |  |  |
|  |  |  |  |  |  |  |  |
|  |  | H (Kcal/mol) |  |  |  |  |  |
| C6H6 + In+  | [C6H6-In]+ | -33.05 |  |  |  |  |  |
|  |  |  |  |  |  |  |  |
|  | Symmetry | Energy (au) | M-Xt | M-Xb | M-Xb-M | Xt-M-Xb | Dihedral |
| [(C6H6)InCpIn(C6H6)]+ | C1 | -661.685627 | 3.069 | 2.591 | 176.3 | 143.3 | 23.5 |
|  |  |  |  |  |  |  |  |
|  |  | H (Kcal/mol) |  |  |  |  |  |
| 2 C6H6 + [InCpIn]+  | [(C6H6)InCpIn(C6H6)]+ | -20.19 |  |  |  |  |  |
|  |  | (Kcal/mol) |  |  |  |  |  |
| Average Bond Energies |  | (Kcal/mol) |  |  |  |  |  |
|  |  |  |  |  |  |  |  |
| [(C6H6)InCpIn-(C6H6)]+ |  | 6.64 |  |  |  |  |  |
| [(C6H6)InCp-In(C6H6)]+ |  | 42.36 |  |  |  |  |  |

B3LYP[[5]](#endnote-6)/AError: Reference source not found,Error: Reference source not found

|  | Symmetry | Energy (au) | M-Xt | M-Xb | M-Xb-M | Xt-M-Xb | Dihedral |
| --- | --- | --- | --- | --- | --- | --- | --- |
| CpSn+ | C5v | -196.6881022 | 2.196 |  |  |  |  |
| Cp2Sn | C2v | -390.4229961 | 2.504 |  |  | 149.9 |  |
| [CpSnCpSnCp]+ | C1 | -587.1545468 | 2.331 | 2.773 | 178.0 | 148.9 | 61.0 |
|  |  |  |  |  |  |  |  |
|  |  | H (Kcal/mol) |  |  |  |  |  |
| CpSn+ + Cp2Sn  | [Cp3Sn2]+ | -27.26 |  |  |  |  |  |
|  |  |  |  |  |  |  |  |
| Average Bond Energies |  | (Kcal/mol) |  |  |  |  |  |
|  |  |  |  |  |  |  |  |
| [CpSnCp-SnCp]+ |  | 36.63 |  |  |  |  |  |
| [CpSnCpSn-Cp]+ |  | 265.32 |  |  |  |  |  |

1. Frisch, M. J.; Trucks, G. W.; Schlegel, H. B.; Gill, P. M. W.; Johnson, B. G.; Robb, M. A.; Cheeseman, J. R.; Keith, T. A.; Petersson, G. A.; Montgomery, J. A.; Raghavachari, K.; Al-Laham, M. A.; Zakrewski, V. G.; Ortiz, J. V.; Foresman, J. B.; Cioslowski, J.; Stefanow, B. B.; Nanayakkara, A.; Challacombe, M.; Peng, C. Y.; Ayala, P. Y.; Chen, W.; Wong, M. W.; Andres, J. L.; Replogle, E. S.; Gomperts, R.; Martin, R. L.; Fox, D. J.; Binkley, J. S.; DeFrees, D. J.; Baker, J.; Stewart, J. P.; Head-Gordon, M.; Gonzalez, C.; Pople, J. A. GAUSSIAN 94 (Revision B.2) (Gaussian, Inc.; Pittsburgh PA, 1995). [↑](#endnote-ref-2)
2. (a) A. D. Becke, *Phys. Rev.*, **1988**, *38*, 3098. (b) J. P. Perdew, *Phys. Rev.*, **1986**, *33*, 8822. [↑](#endnote-ref-3)
3. 6-31G* for C and H, ECP and (3s3p1d) basis sets of Bergner et al. (ref 4.) for In and Sn. [↑](#endnote-ref-4)
4. A. Bergner, M. Dolg,W. Kuechle, H Stoll, and H Preuss, H. *Mol. Phys.*, **1993**, *80*, 1431. [↑](#endnote-ref-5)
5. (a) A. D. Becke, *J. Chem. Phys.*, **1993**, *98*, 5648. (b) A. D. Becke, *Phys. Rev. A*, **1988**, *38*, 3098. (c) C. Lee, W. Yang, and R. G. Parr, *Phys. Rev. B*, **1988**, *37*, 785. (d) S. H. Vosko, L. Wilk, and M. Nusair, *Can. J. Phys.*, **1980**, *58*, 1200. [↑](#endnote-ref-6)
